# Supplementary material for: Characterization of tissue-specific biomarkers with the expression of circRNAs in forensically relevant body fluids
Source: Springer Nature journal article supplement (doi:10.1007/s00414-019-02027-y), 2019-02-27
Supplement: MOESM5 [file 16513516]

**Table S1** Tissue-specific candidate genes for the identification of circular transcripts.

| Gene symbol | Full name |
| --- | --- |
| **Menstrual blood** |  |
| MMP10* | Matrix metallopeptidase 10 |
| MMP26 | Matrix metallopeptidase 26 |
| **Semen** |  |
| TGM4* | Transglutaminase 4 |
| KLK2 | Kallikrein-2 |
| KLK3* | Kallikrein-3 |
| PRM1* | Protamine 1 |
| PRM2* | Protamine 2 |
| MSMB | Microseminoprotein, beta- |
| SEGM1 | Semenogelin 1 |
| LDHC | Lactate dehydrogenase C |
| CRISP3 | Cysteine rich secretory protein 3 |
| **Saliva** |  |
| HTN3* | Histatin 3 |
| STATH* | Statherin |
| MUC7 | Mucin 7, secreted |
| BPIFB2 | BPI fold containing family B Member 2 |
| C6orf58 | Chromosome 6 open Reading Frame 58 |
| FDCSP | Follicular dendritic cell secreted protein |
| MUC5B | Mucin 5, subtype B, Tracheobronchial |
| LPO | Lactoperoxidase |
| ODAM | Odontogenic, ameloblast Asssociated |
| ZG16B | Zymogen granule protein 16B |
| **Vaginal secretion** |  |
| MUC4* | Mucin 4 |
| HBD1* | Human beta-defensin 1 |
| CYP2B7P1* | Cytochrome P450, family 2, subfamily B, polypeptide 7 pseudogene 1 |
| KRT4 | Keratin 4 |
| KRT6A | Keratin 6A |
| SPINK5 | Serine peptidase inhibitor, kazal Type 5 |
| SERPINB3 | Serpin peptidase inhibitor, clade B (ovalbumin), member 3 |
| MSLN | Mesothelin |
| PAEP | Progestagen associated endometrial protein |
| ARX | Aristaless related homeobox |
| ESR1 | Estrogen receptor 1 |
| **Urine** |  |
| UMOD* | Uromodulin |
| AQP2 | Aquaporin 2 |
| UPK1A | Uroplakin 1A |
| UPK2 | Uroplakin 2 |
| UPK3A* | Uroplakin 3A |
| SLC22A6 | Solute carrier family 22 member 6 |
| SLC22A8 | Solute carrier family 22 member 8 |
| SLC22A11 | Solute carrier family 22 member 11 |
| SLC22A12 | Solute carrier family 22 member 12 |
| SLC12A1 | Solute carrier family 12 member 1 |
| SLC12A3 | Solute carrier family 12 member 3 |
| MIOX | Myo-inositol oxygenase |
| NPHS2 | Nephrosis 2 |

*Markers commonly used in the identification of forensically relevant body fluids.
