# Supplementary material for: Characterization of tissue-specific biomarkers with the expression of circRNAs in forensically relevant body fluids
Source: Springer Nature journal article supplement (doi:10.1007/s00414-019-02027-y), 2019-02-27
Supplement: MOESM9 [file 16513516]

**Table S5** The ratio of RNase R-resistant transcripts to all transcripts of a single gene in the indicated tissue.

| Genes | Tissues | Mean △Ct | R/T |
| --- | --- | --- | --- |
| HBA | Blood | 6.03 | 2.18% |
| ALAS2 | Blood | 3.16 | 13.05% |
| MMP7 | Menstrual blood | 3.71 | 9.21% |
| MMP10 | Menstrual blood | 3.45 | 9.62% |
| SPINK5 | Vaginal secretion | 6.21 | 1.38% |
| SERPINB3 | Vaginal secretion | 4.37 | 5.08% |
| ESR1 | Vaginal secretion | 4.99 | 3.99% |
| CYP2B7P1 | Vaginal secretion | 4.63 | 5.18% |
| HTN3 | Saliva | 7.24 | 0.78% |
| TGM4 | Semen | 2.70 | 17.33% |
| KLK3 | Semen | 2.88 | 14.96% |
| PRM2 | Semen | 2.07 | 26.06% |
| SLC22A6 | Urine | 10.49 | 0.12% |
| MIOX | Urine | 6.05 | 2.06% |

R/T is the ratio of RNase R-resistant transcripts to all transcripts.
